# Supplementary material
Source: Elsevier journal article supplement (https://www.sciencedirect.com/science/article/pii/S2387020622001218)
Supplement: mmc1 [file S2387020622001218:mmc1.docx]

**Material suplementario**

**Tabla 1.-** Gradación del síndrome de liberación de citocinas (*Lee DW et al, BBMT 2019*)

*Abreviaturas: T – Temperatura; L/min – litros/minuto; VMK – Ventimask; CNAF - cánulas nasales de alto flujo; CPAP - Continuous Positive Airway Pressure en inglés/* *presión positiva continua en la vía respiratoria.*

Recordar:

- El grado de síndrome de liberación de citocinas (SLC) viene definido por el evento más grave.
- Grado 5 es muerte debido a SLC tras excluir otras posibles causas.
- La resolución viene definida por la desaparición de todos los signos.

**Tabla 2.-** Tratamiento del síndrome de liberación de citocinas en función del grado.

**Tabla 3.-** Gradación de la neurotoxicidad (*Lee DW et al, BBMT 2019*)

*Abreviaturas: ICE - Immune Effector Cell-Associated Encephalopathy en inglés/encefalopatía asociada con células inmunoefectoras; EEG – electroencefalograma; min – minutos*

**Recordar:**

- El grado de neurotoxicidad (NT) viene definido por el evento más grave.
- Grado 5 es muerte debido a NT tras excluir otras posibles causas.
- La resolución viene definida por la desaparición de todos los signos.

**Escala ICE:**

- Orientación en año, mes, ciudad, hospital 🡪 4 puntos
- Nominar 3 objetos 🡪 3 puntos
- Seguir órdenes simples 🡪 1 puntos
- Escritura de una oración completa 🡪 1 puntos
- Atención: restar 10 a 100 de forma repetida 🡪 1 punto

**Tabla 4.-** Manejo de la neurotoxicidad (NT) en función del grado.
